# Supplementary material for: In situ fabrication of Cu2ZnSnS4 nanoflake thin films on both rigid and flexible substrates
Source: Royal Society of Chemistry journal article supplement (doi:10.1039/c4ce00174e), 2014-01-01
Supplement: c4ce00174e1.pdf [file c4ce00174e1.pdf]

Supporting Information for

***In-situ* fabrication of Cu<sub>2</sub>ZnSnS<sub>4</sub> (Se<sub>4</sub>) nanoflake thin films  
on both rigid and flexible substrates**

***Xuezhen Zhai<sup>1,2</sup>, Huimin Jia<sup>1</sup>, Yange Zhang<sup>1</sup>, Yan Lei<sup>1</sup>, Jie Wei<sup>1,2</sup>, Yuanhao Gao<sup>1</sup>,  
Junhao Chu<sup>2</sup>, Weiwei He<sup>1,3</sup>, Jun-jie Yin<sup>3</sup>, Zhi Zheng<sup>1\*</sup>***

<sup>1</sup>Key Laboratory of Micro-Nano Materials for Energy Storage and Conversion of  
Henan Province and Institute of Surface Micro and Nano Materials, Xuchang  
University Henan 461000, China

<sup>2</sup>Key Laboratory of Polar Materials and Devices, Ministry of Education. Department  
of Electronics, East China Normal University. 500 Dongchuan Road, Shanghai  
200241, China

<sup>3</sup>Center for Food Safety and Applied Nutrition, U.S. Food and Drug Administration,  
College Park, MD 20740, USA

Corresponding Authors: E-mail: [zhengzhi99999@gmail.com](mailto:zhengzhi99999@gmail.com)  
[zzheng@xcu.edu.cn](mailto:zzheng@xcu.edu.cn)

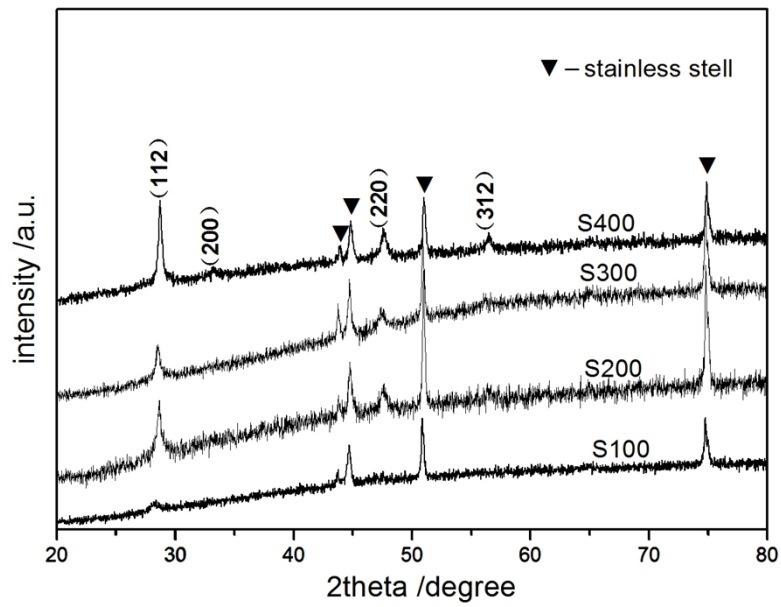

**Figure. S1** XRD patterns of the CZTS nanocrystalline thin films samples prepared for 18 h at 250 °C on stainless steel substrates. The thicknesses of CuSnZn alloy layers were 100 nm~400 nm.

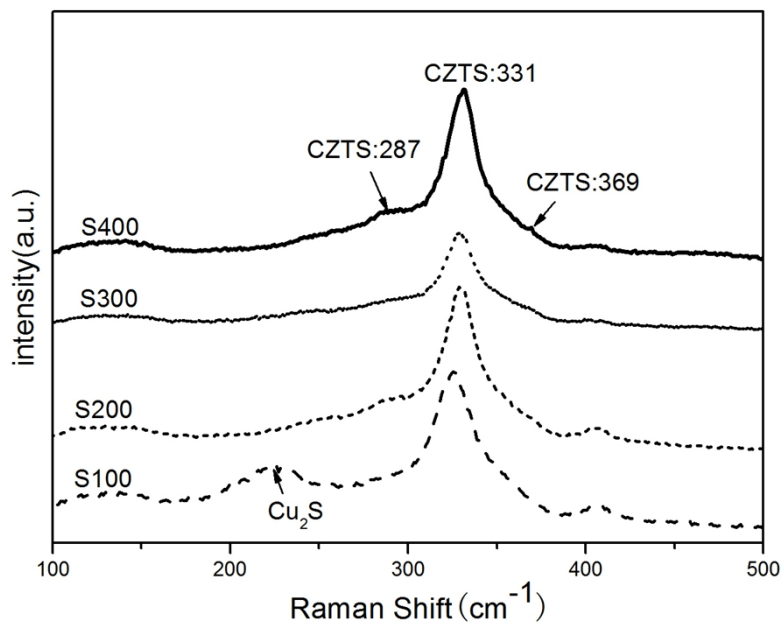

**Figure. S2** Raman spectra of the CZTS nanocrystalline thin films samples prepared for 18 h at 250 °C on stainless steel substrates. The thicknesses of CuSnZn alloy layers are 100 nm~400 nm.

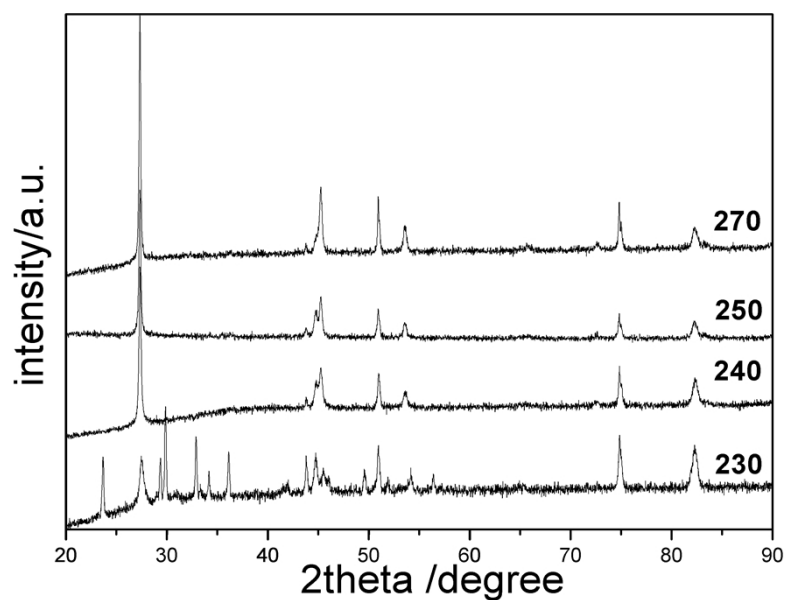

**Figure. S3** XRD patterns of the CZTSe nanocrystalline thin films samples prepared at 230~270°C for 18 h on stainless steel substrates. The thickness of CuSnZn alloy layer is 400nm.

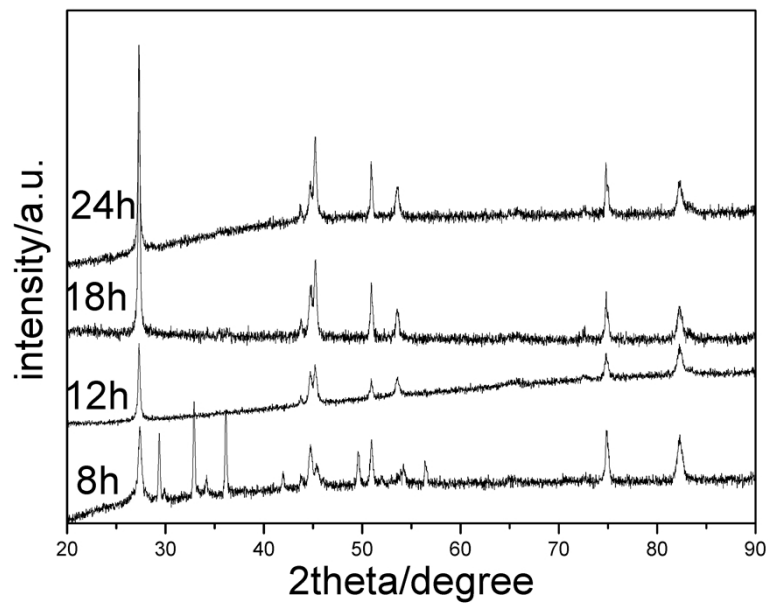

**Figure. S4** XRD patterns of the CZTSe nanocrystalline thin films samples prepared for 18h~24h at 250 °C on stainless steel substrates. The thickness of CuSnZn alloy layer is 400nm.

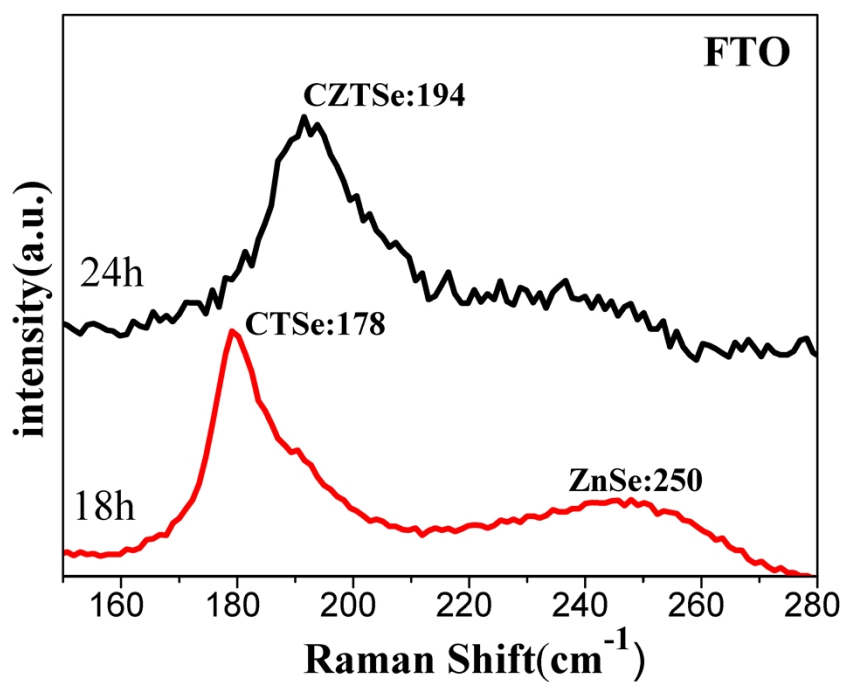

**Figure. S5** Raman spectra of the CZTSe nanocrystalline thin films samples prepared for 18 h and 24 h at 250 °C on FTO substrates.

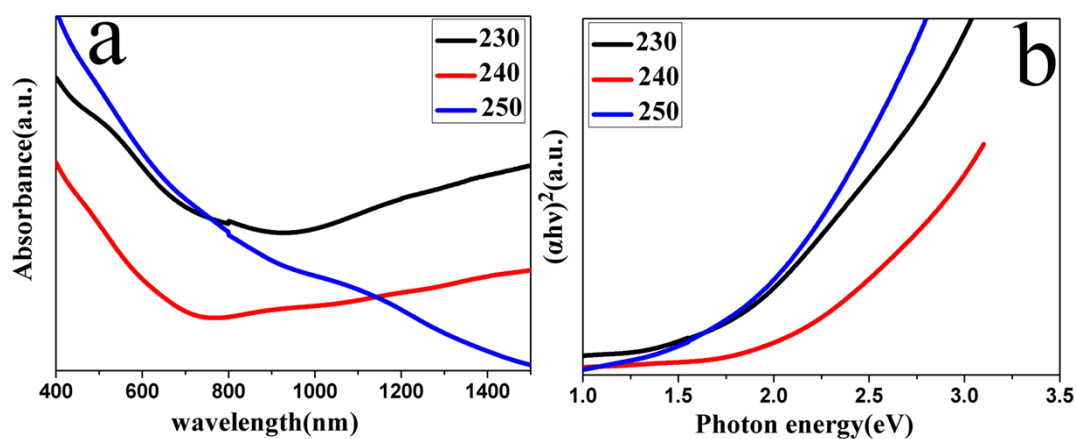

Figure S6 UV-vis-NIR absorption spectra of the CZTS thin film prepared at 230°C, 240°C and 250°C for 18 h (a) and the corresponding  $(\alpha h\nu)^2$  vs.  $h\nu$  curve (b).

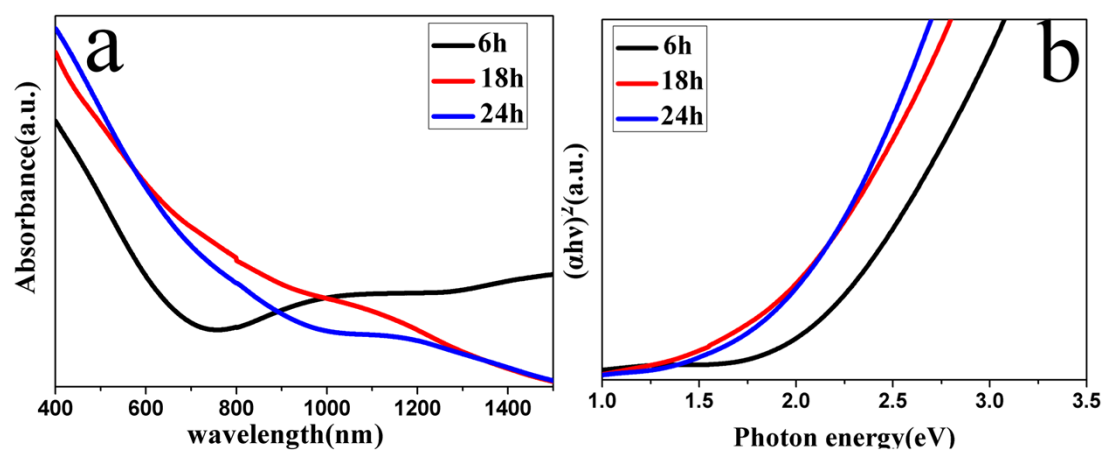

Figure S7 UV-vis-NIR absorption spectra of the CZTS thin film prepared at 250°C for 6 h, 18 h and 24 h (a) and the corresponding  $(\alpha h\nu)^2$  vs.  $h\nu$  curves (b).

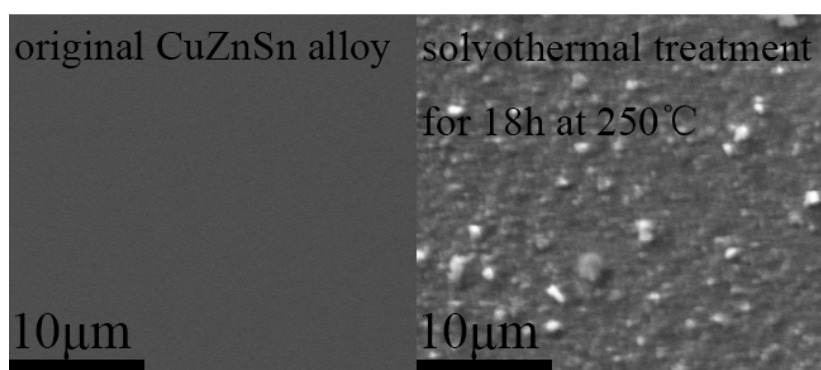

Figure S8 SEM images of the original and solvothermal treated alloy surface.
